# Supplementary material
Source: MDPI journal article supplement (https://www.mdpi.com/2075-163X/10/6/491)
Supplement: s1 [file s1]

**Table S1.** Solid loss and REs content in leaching solid residue and leachate solution at the end of the tests for each test set.

| Acid Type                            | Solid Residue Yield (%) | TREE in Solid Residue (mg/kg) | TREE in Leachate (mg/L) |
|--------------------------------------|-------------------------|-------------------------------|-------------------------|
| 1 M H <sub>2</sub> SO <sub>4</sub>   | 89.9                    | 182.3                         | 4.6                     |
| 1 M HCl                              | 82.9                    | 151.1                         | 5.2                     |
| 1 M HNO <sub>3</sub>                 | 88.2                    | 169.3                         | 4.7                     |
| Stirring Speed                       | Solid Residue Yield (%) | TREE in Solid Residue (mg/kg) | TREE in Leachate (mg/L) |
| 300 rpm                              | 84.7                    | 221.4                         | 4.2                     |
| 530 rpm                              | 85.1                    | 195.0                         | 4.4                     |
| 760 rpm                              | 89.9                    | 182.3                         | 4.6                     |
| 900 rpm                              | 87.0                    | 192.4                         | 4.3                     |
| Solid-to-Liquid Ratio                | Solid Residue Yield (%) | TREE in Solid Residue (mg/kg) | TREE in Leachate (mg/L) |
| S/L = 10 g/L                         | 89.9                    | 182.3                         | 4.6                     |
| S/L = 20 g/L                         | 90.7                    | 221.6                         | 9.5                     |
| S/L = 100 g/L                        | 93.9                    | 315.5                         | 34.4                    |
| S/L = 200 g/L                        | 95.0                    | 375.7                         | 49.0                    |
| Acid Concentration                   | Solid Residue Yield (%) | TREE in Solid Residue (mg/kg) | TREE in Leachate (mg/L) |
| 0.1 M H <sub>2</sub> SO <sub>4</sub> | 92.7                    | 402.5                         | 2.5                     |
| 0.5 M H <sub>2</sub> SO <sub>4</sub> | 91.2                    | 248.3                         | 4.1                     |
| 1 M H <sub>2</sub> SO <sub>4</sub>   | 89.9                    | 182.3                         | 4.6                     |
| 2 M H <sub>2</sub> SO <sub>4</sub>   | 85.6                    | 191.9                         | 5.4                     |
| Temperature                          | Solid Residue Yield (%) | TREE in Solid Residue (mg/kg) | TREE in Leachate (mg/L) |
| 25 °C                                | 96.6                    | 386.5                         | 2.0                     |
| 40 °C                                | 92.6                    | 327.5                         | 3.1                     |
| 50 °C                                | 91.5                    | 235.2                         | 3.9                     |
| 60 °C                                | 88.7                    | 239.2                         | 4.0                     |
